# Supplementary material for: Innovative triazine-core octupolar chromophores: unlocking new Frontiers in nonlinear optics
Source: Royal Society of Chemistry journal article supplement (doi:10.1039/d4tc01975j), 2024-01-01
Supplement: d4tc01975j1.pdf [file d4tc01975j1.pdf]

## Innovative Triazine-Core Octupolar Chromophores: Unlocking New Frontiers in Nonlinear Optics

Houda El Karout<sup>1,2</sup>, Aykun Ozkonstanyon<sup>3</sup>, Ecem Senturk<sup>3</sup>, Belkız Bilgin Eran<sup>3</sup>, Said Taboukhat<sup>1</sup>, Anna Zawadzka<sup>4,5</sup>, Adam Szukalski<sup>6\*</sup>, Abdelkrim El-Ghayoury<sup>2\*</sup>, Huriye Akdaş Kılıç<sup>3,7\*</sup> and Bouchta Sahraoui<sup>1</sup>

<sup>1</sup> Univ Angers, LPHIA, SFR MATRIX, F-49000 Angers, France

<sup>2</sup> Univ Angers, CNRS, MOLTECH-ANJOU, SFR MATRIX, F-49000 Angers, France

<sup>3</sup> Yildiz Technical University, Department of Chemistry, 34220 Esenler, Istanbul, Turkey

<sup>4</sup> Institute of Physics, Faculty of Physics, Astronomy and Informatics, Nicolaus Copernicus University in Torun, Grudziadzka 5, 87-100 Torun, Poland

<sup>5</sup> Centre for Modern Interdisciplinary Technologies, Nicolaus Copernicus University, Wilenska 4, 87-100 Torun, Poland

<sup>6</sup> Faculty of Chemistry, Institute of Advanced Materials, Wroclaw University of Science and Technology, Wyb. Wyspianskiego 27, 50-320 Wroclaw, Poland

<sup>7</sup> Univ Rennes, CNRS, ISCR - UMR 6226, F-35000 Renne, France

### UV-Vis

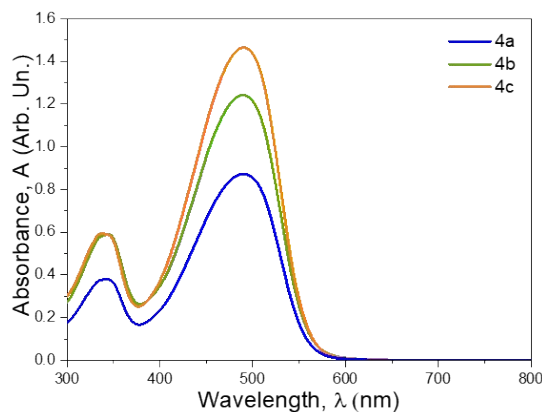

**Figure S1.** UV-vis absorption spectra of 4a-c solutions in THF at a concentration of 0.5mM.

### NMR (<sup>1</sup>H and <sup>13</sup>C-NMR APT)

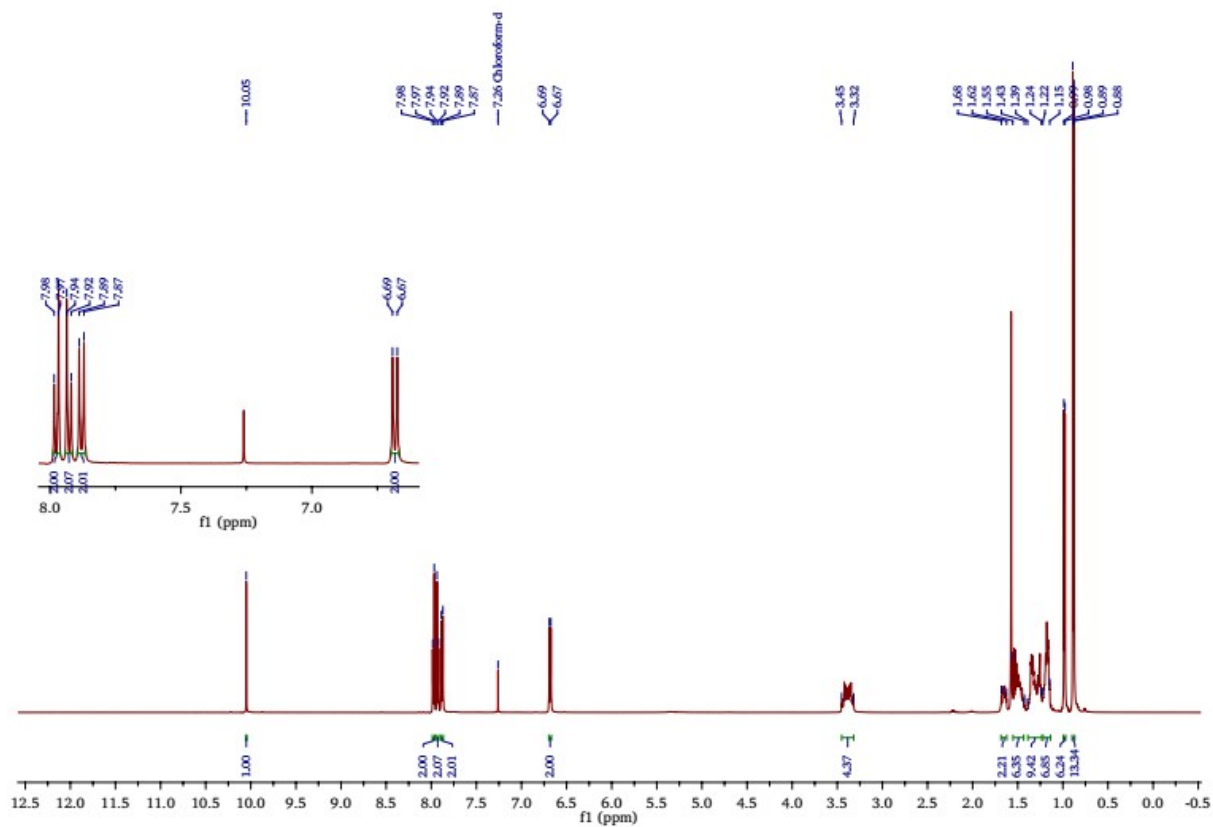

Figure S2  $^1\text{H-NMR}$  ( $\text{CDCl}_3$ ) spectrum of compound 3a

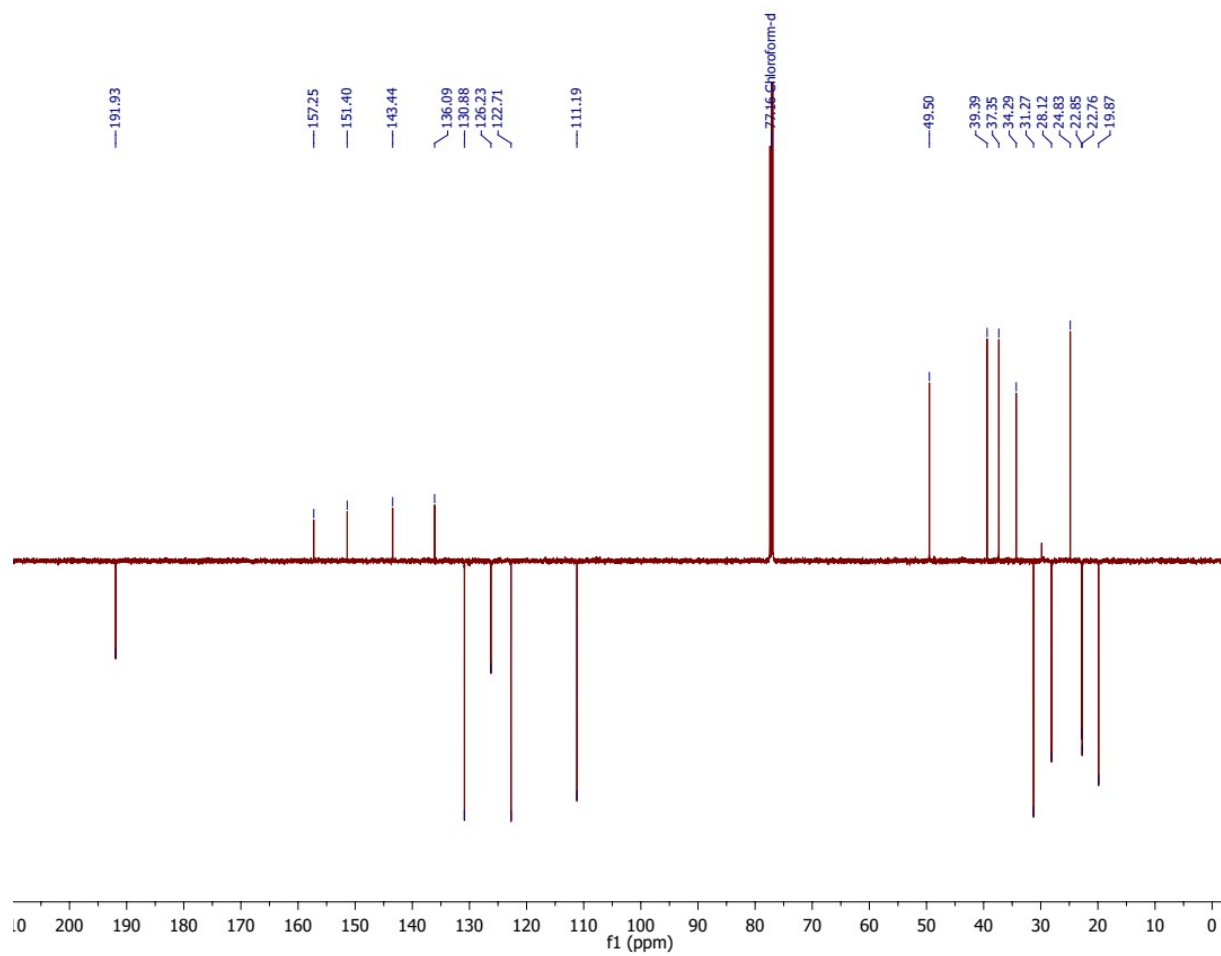

**Figure S3** <sup>13</sup>C-NMR (CDCl<sub>3</sub>) spectrum of compound 3a

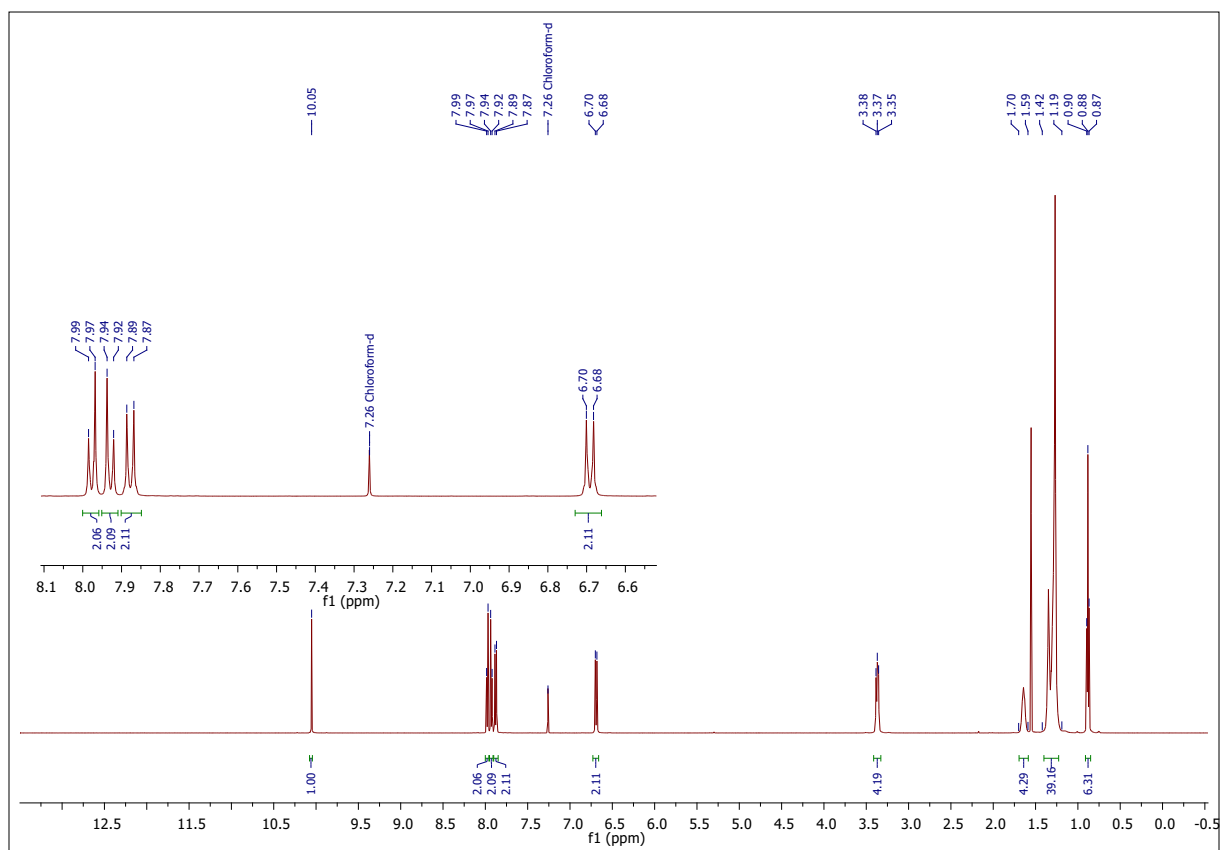

Figure S4  $^1\text{H-NMR}$  ( $\text{CDCl}_3$ ) spectrum of compound 3b

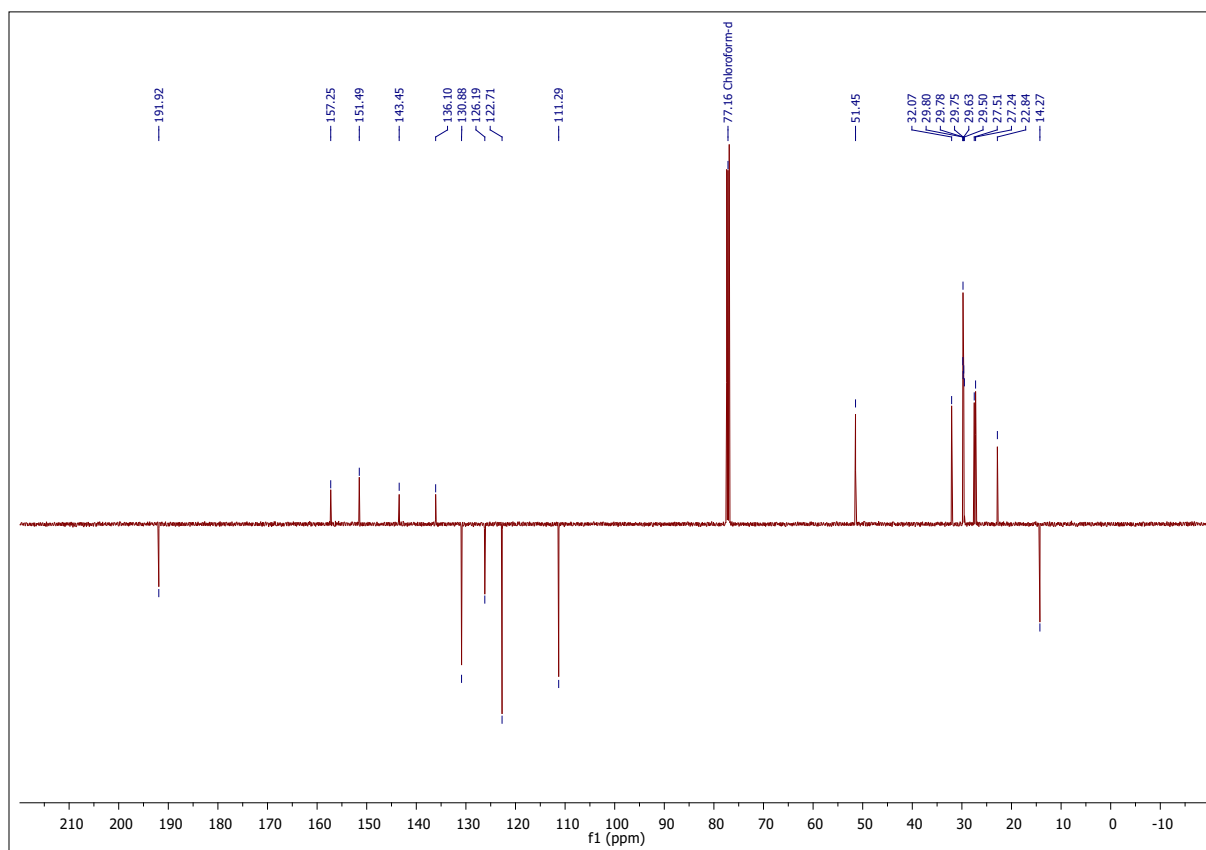

Figure S5  $^{13}\text{C-NMR}$  ( $\text{CDCl}_3$ ) spectrum of compound 3b

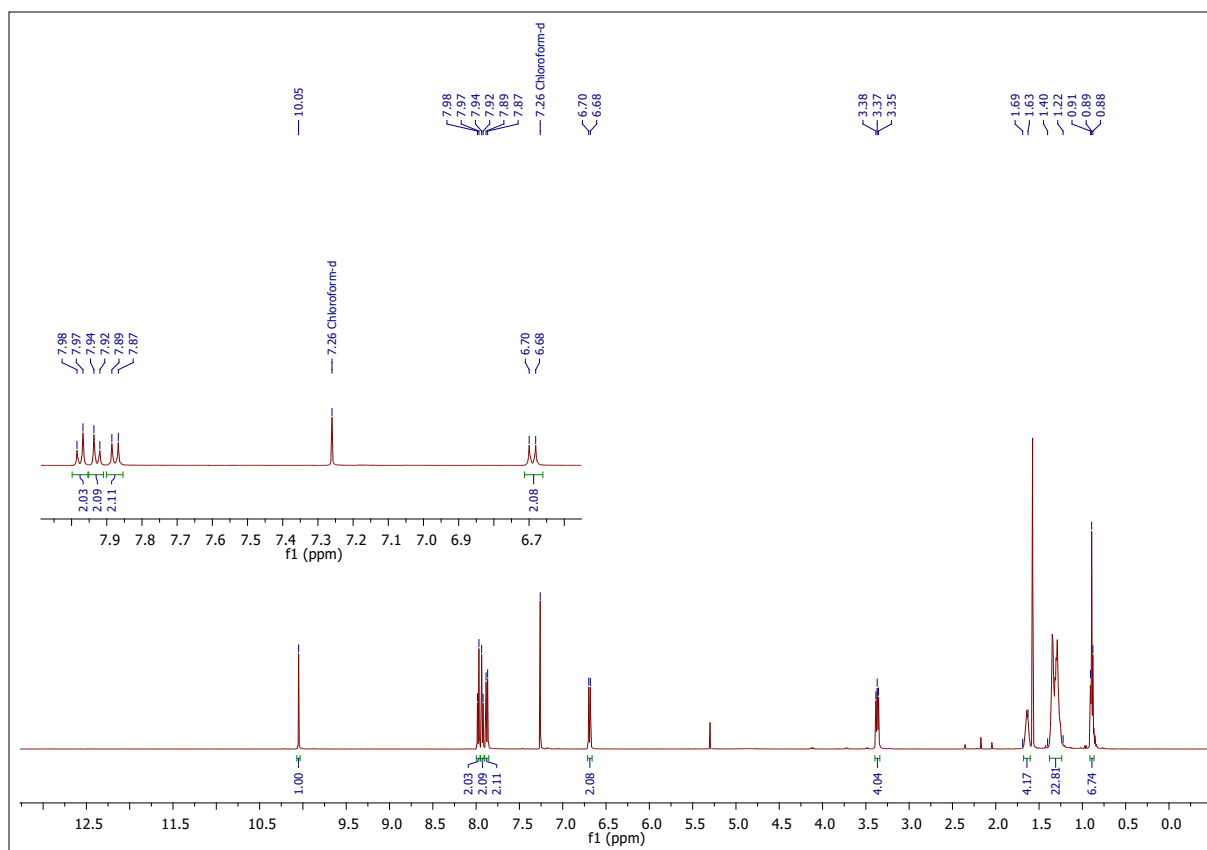

Figure S6  $^1\text{H-NMR}$  ( $\text{CDCl}_3$ ) spectrum of compound 3c

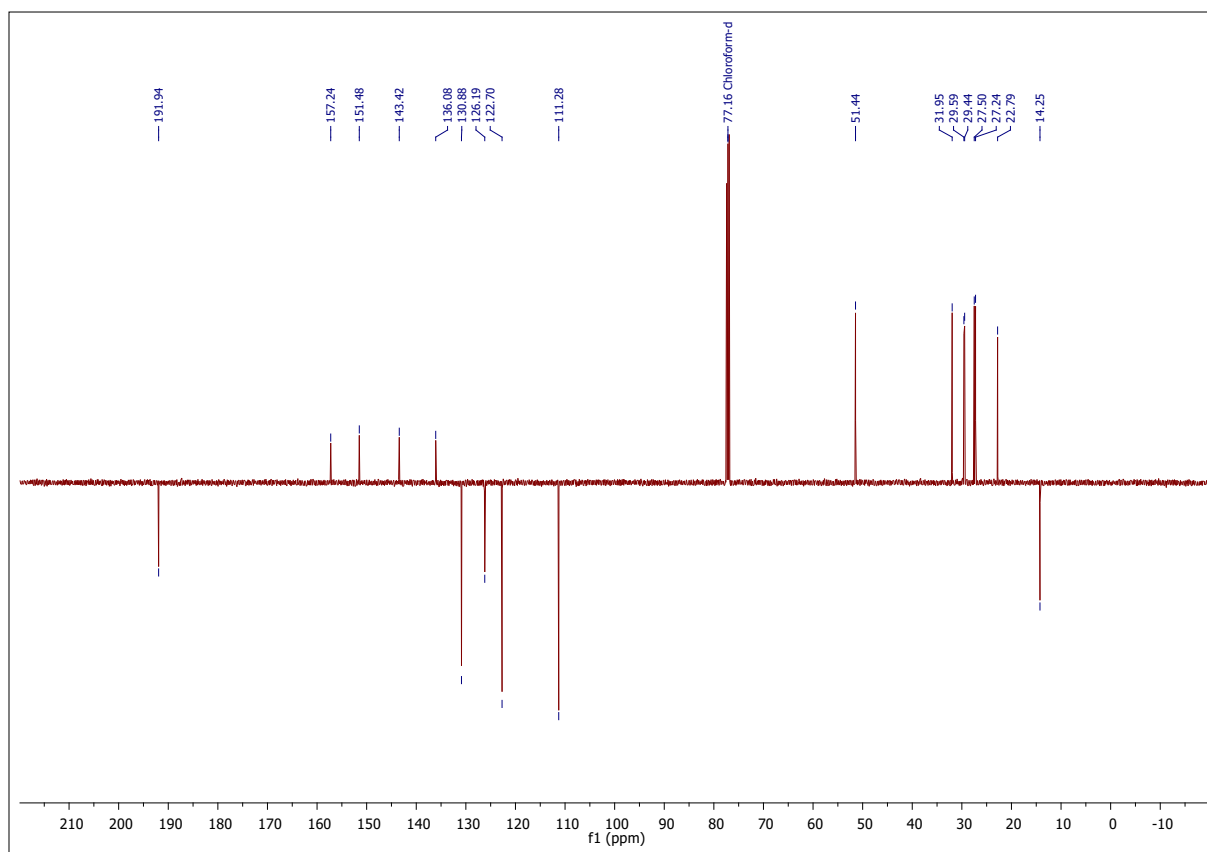

**Figure S7**  $^{13}\text{C}$ -NMR ( $\text{CDCl}_3$ ) spectrum of compound 3c

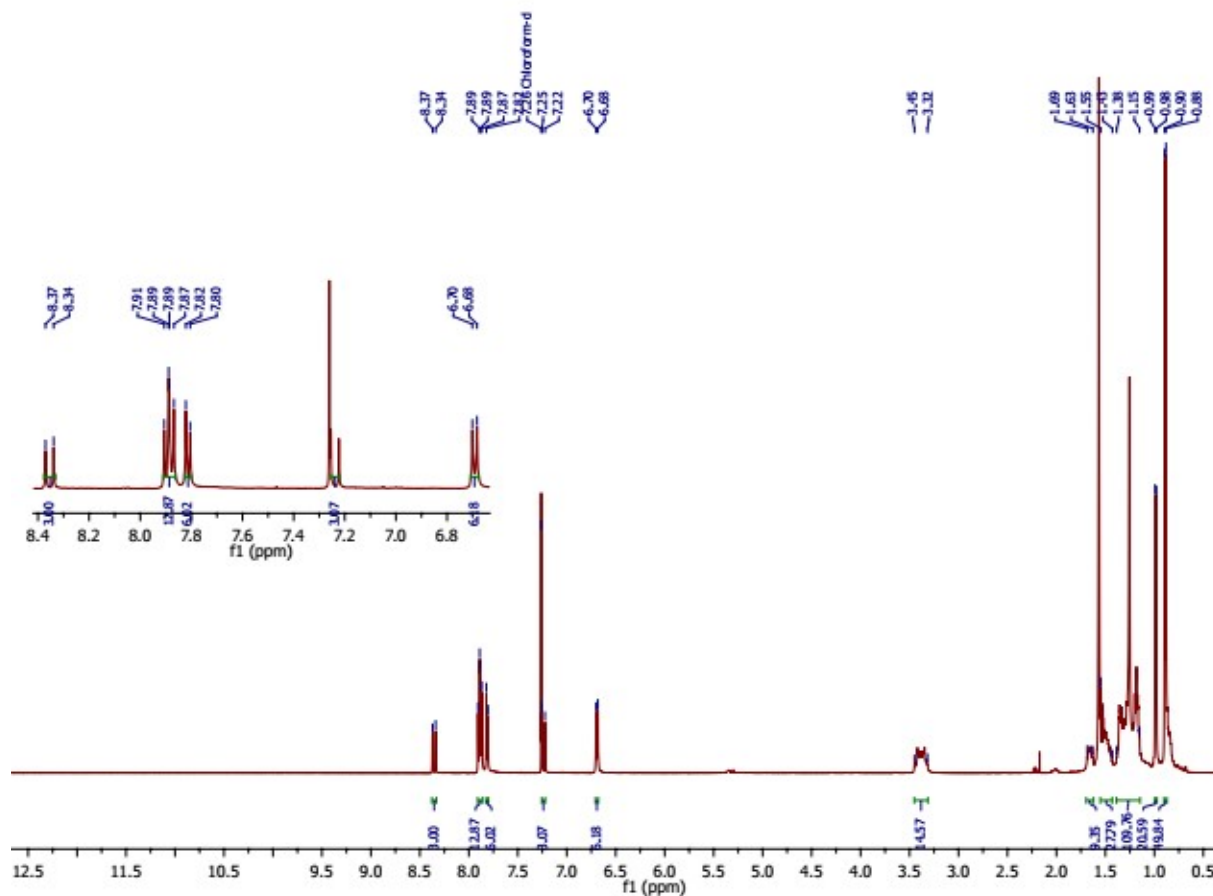

Figure S8  $^1\text{H-NMR}$  ( $\text{CDCl}_3$ ) spectrum of compound 4a

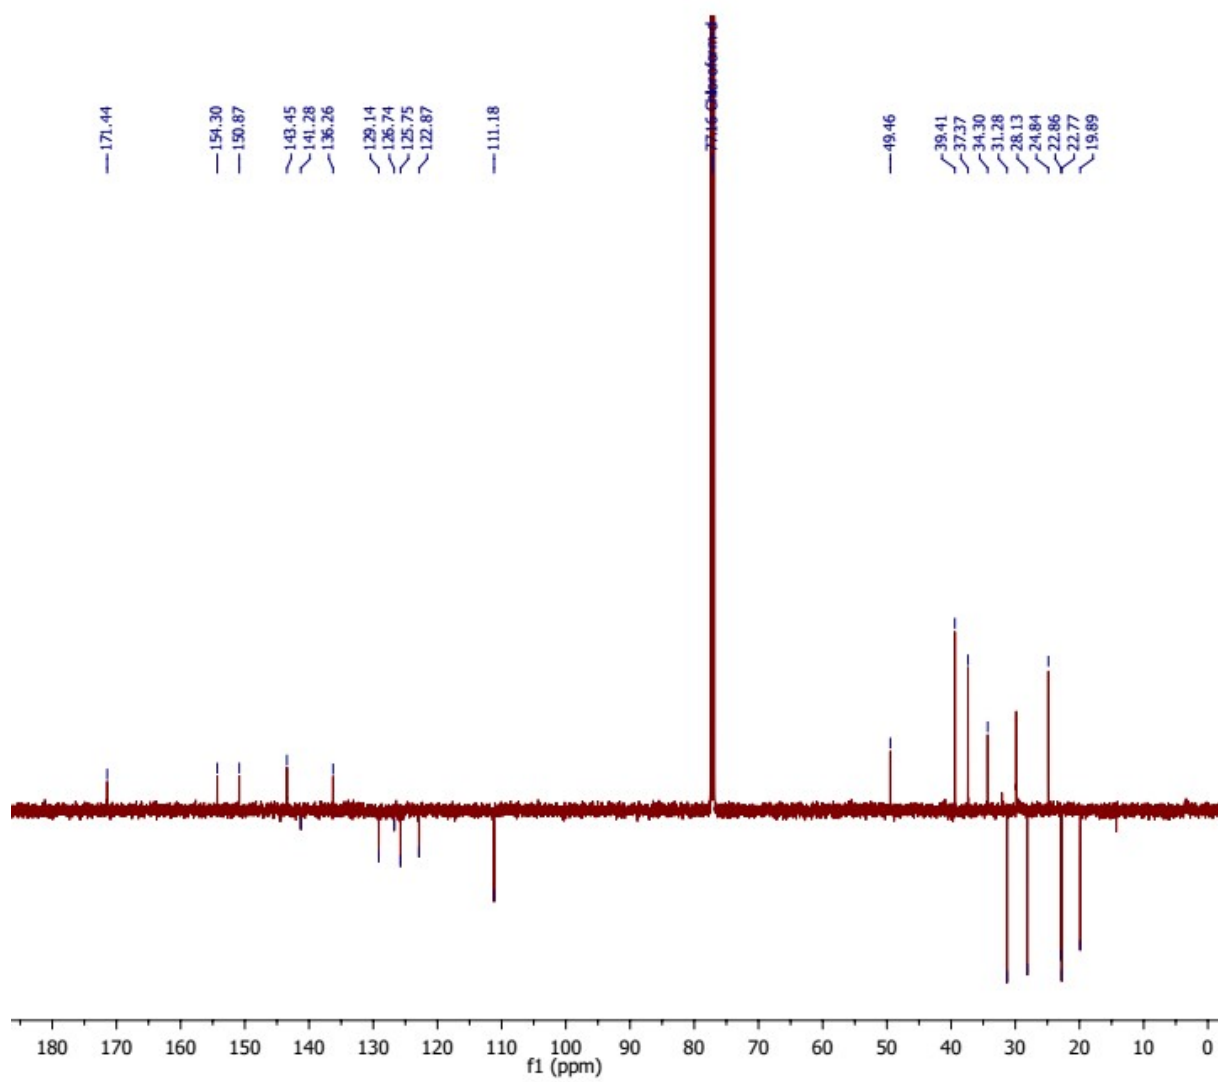

Figure S9 <sup>13</sup>C-NMR (CDCl<sub>3</sub>) spectrum of compound 4a



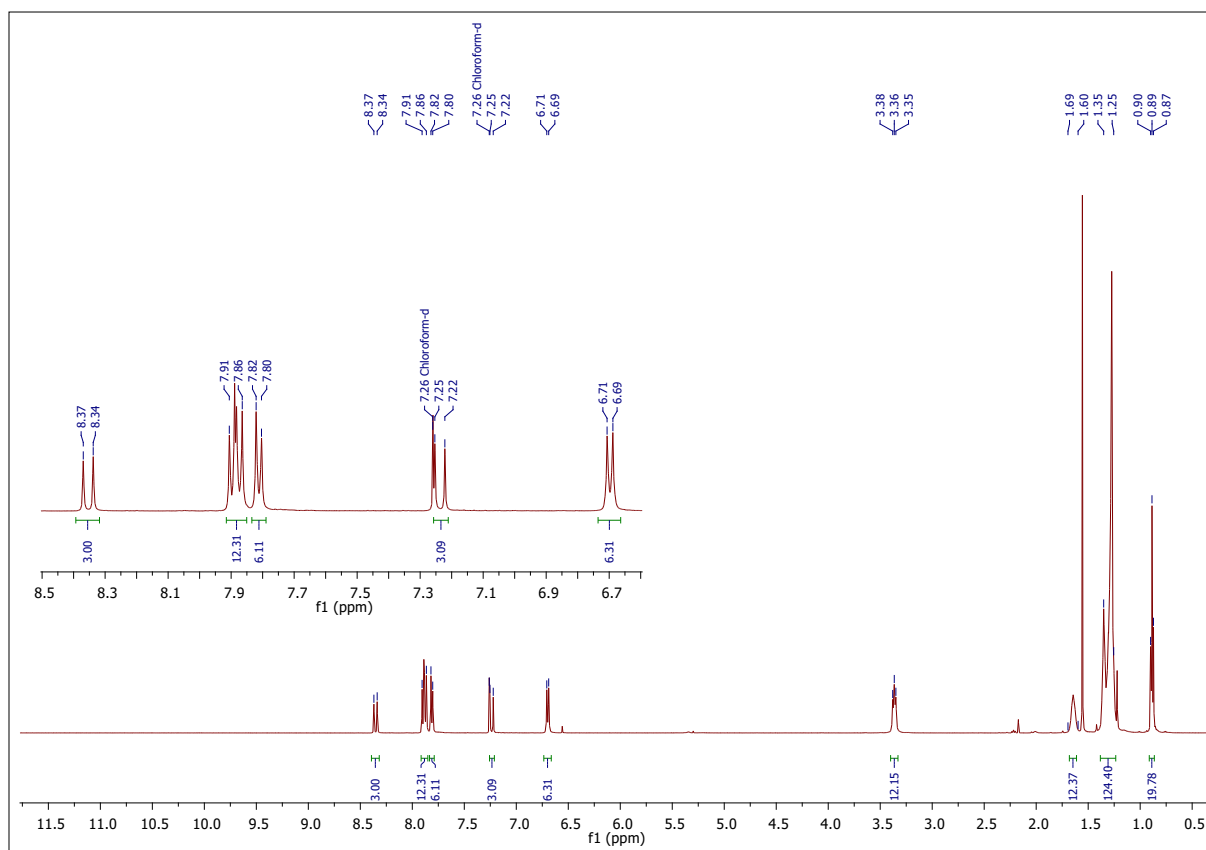

Figure S10  $^1\text{H-NMR}$  ( $\text{CDCl}_3$ ) spectrum of compound 4b

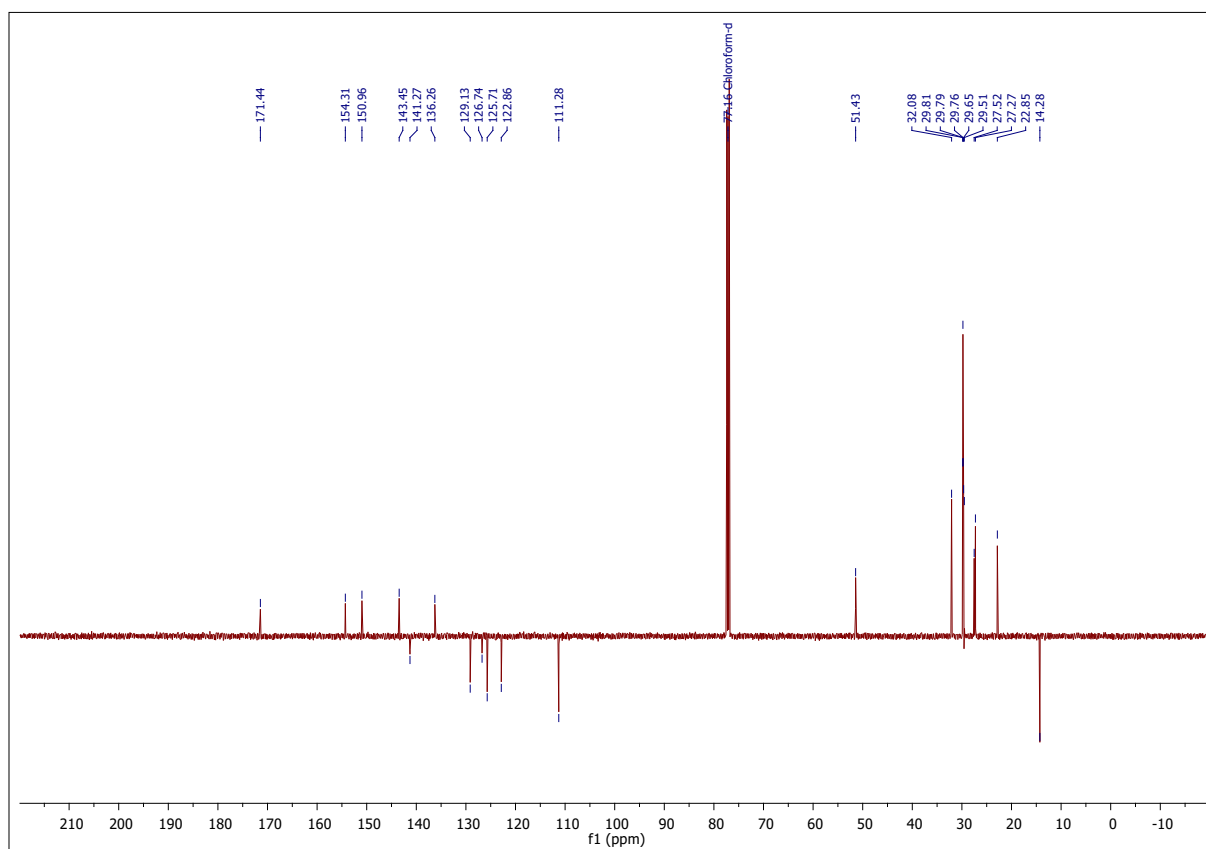

Figure S11  $^{13}\text{C-NMR}$  ( $\text{CDCl}_3$ ) spectrum of compound 4b

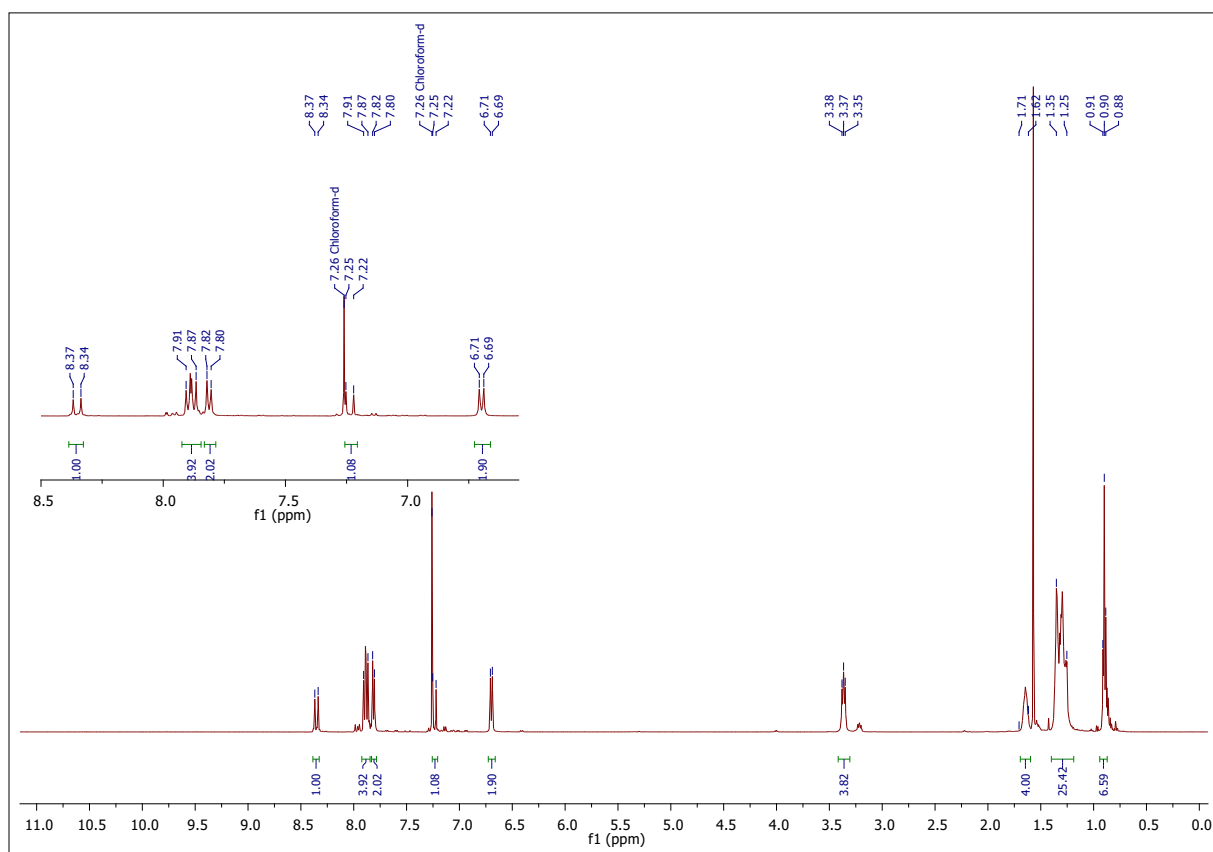

Figure S12  $^1\text{H-NMR}$  ( $\text{CDCl}_3$ ) spectrum of compound 4c

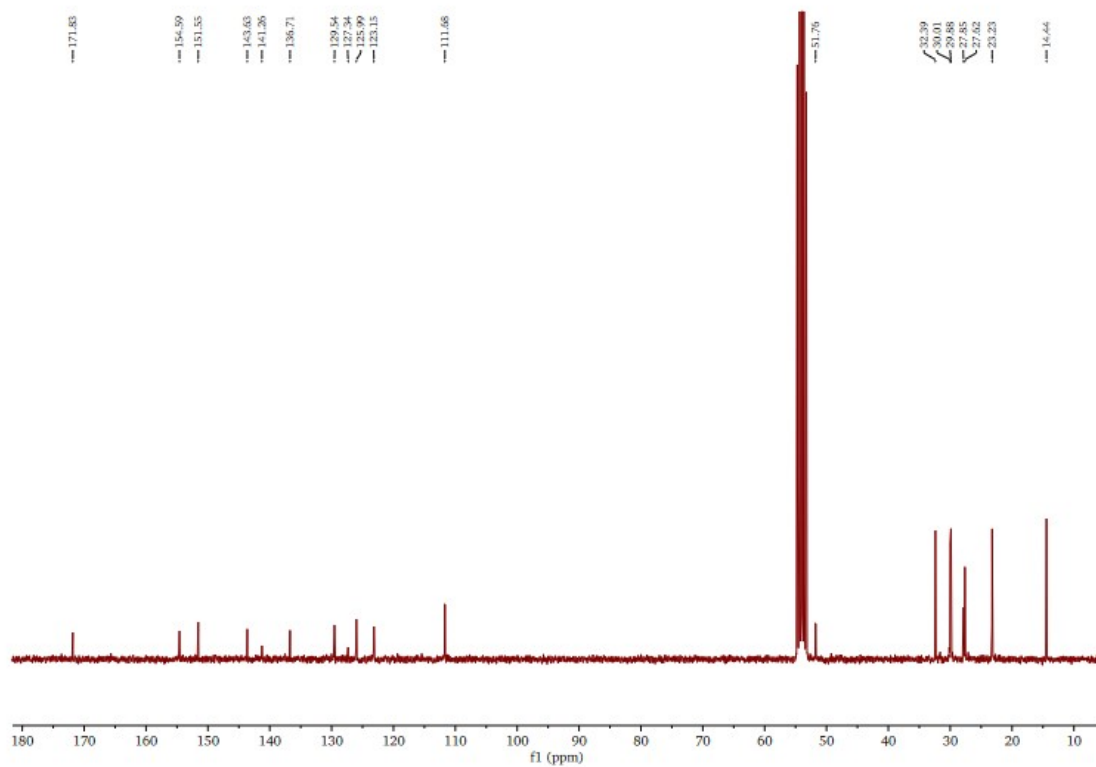

Figure S13  $^{13}\text{C-NMR}$  ( $\text{CDCl}_3$ ) spectrum of compound 4c

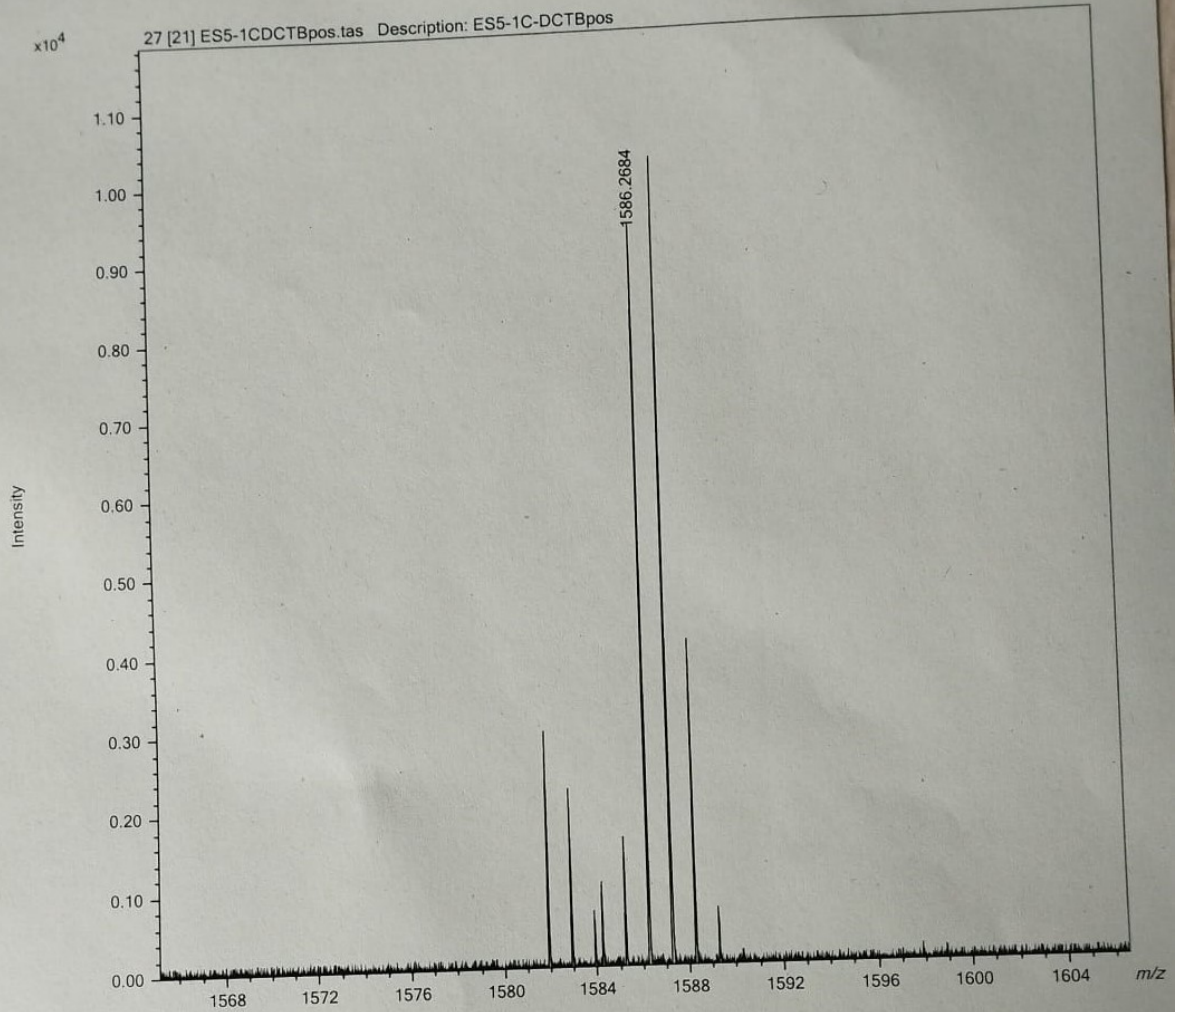

Elemental Composition Estimation

Parameters:

| Mass                 | Tolerance | Electron Mode | Charge | DBE Range    | Max Results |
|----------------------|-----------|---------------|--------|--------------|-------------|
| 1586.26844 ± 0.00476 | 3.0 ppm   | Even          | +1     | -0.5 - 100.0 | 100         |

Elements

| C       | H       | N      | O     | Na    | Si    |
|---------|---------|--------|-------|-------|-------|
| 0 - 110 | 0 - 200 | 0 - 15 | 0 - 0 | 0 - 0 | 0 - 0 |

Results:

| # | Formula                                           | Mass       | DBE  | Abs. Error (u) | Error (u) | Error (ppm) |
|---|---------------------------------------------------|------------|------|----------------|-----------|-------------|
| 1 | C <sub>105</sub> H <sub>157</sub> N <sub>12</sub> | 1586.26487 | 33.5 | 0.00357        | 0.00357   | 2.25        |

Figure S14 HMRS spectrum of compound 4a

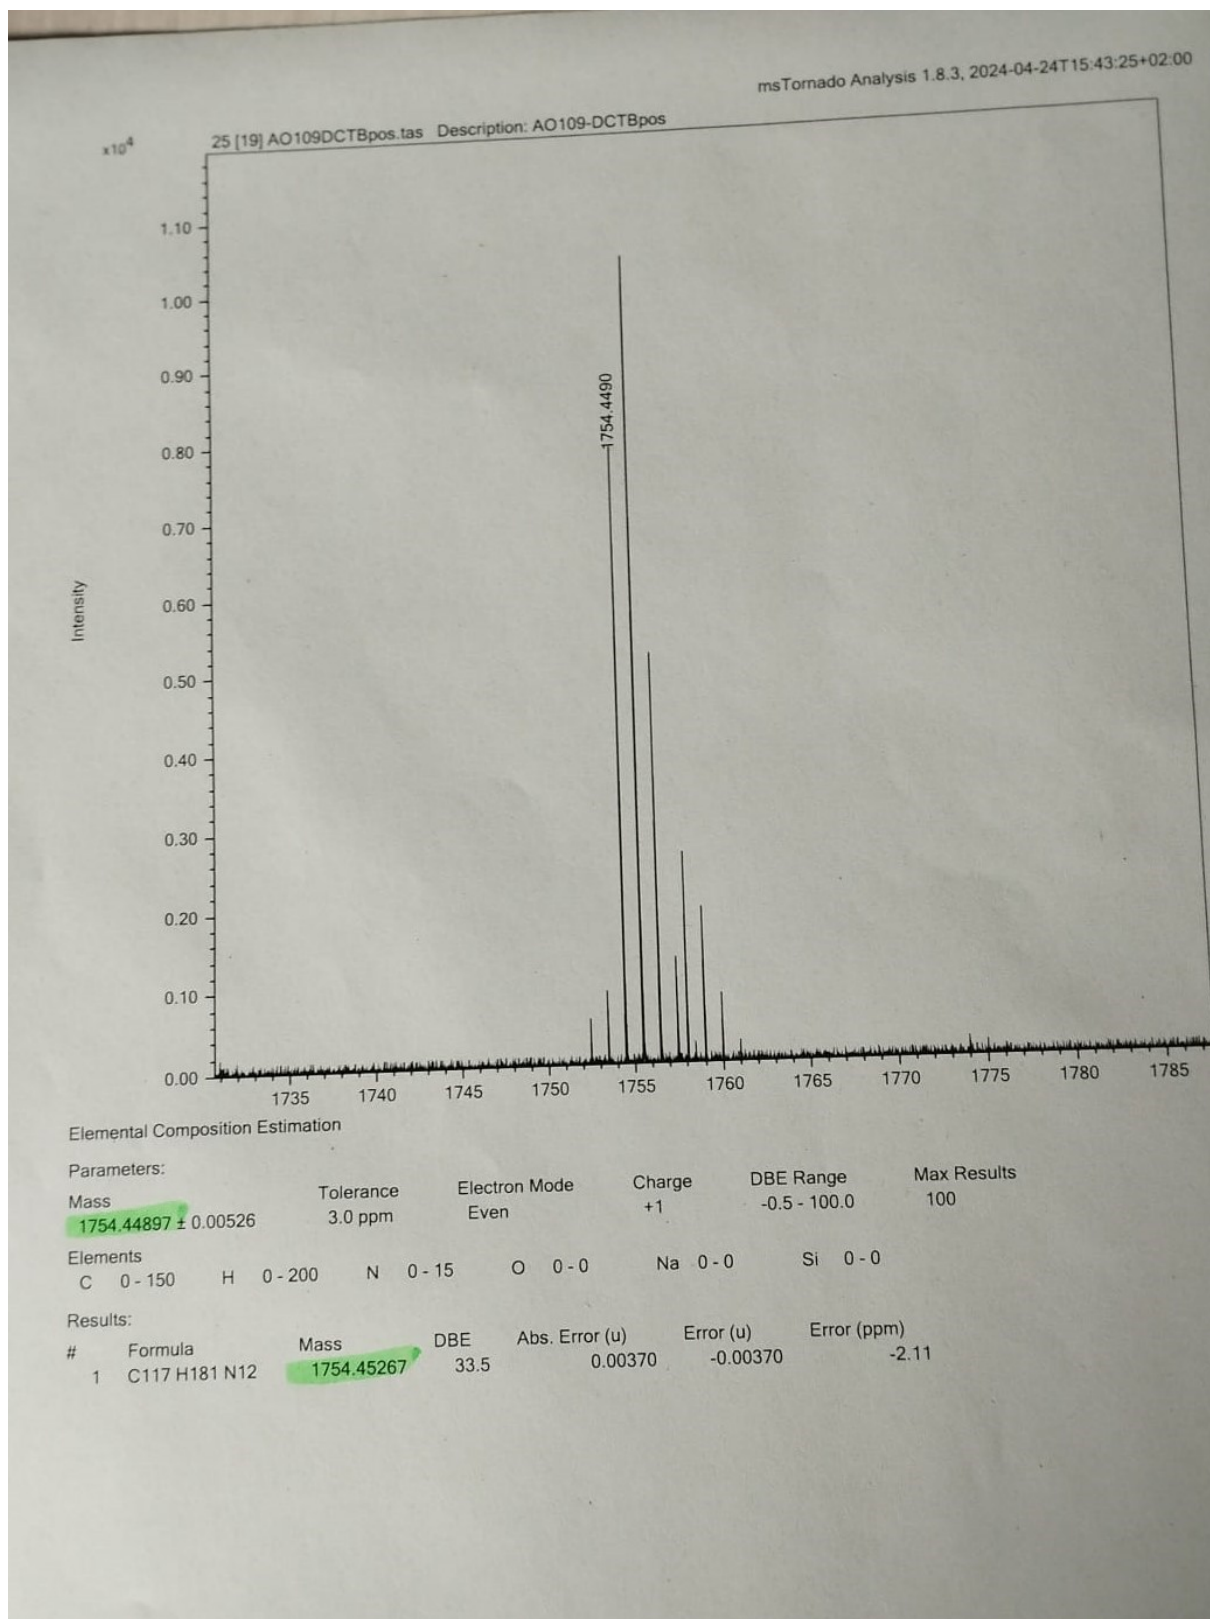

Figure S15 HMRS spectrum of compound 4b

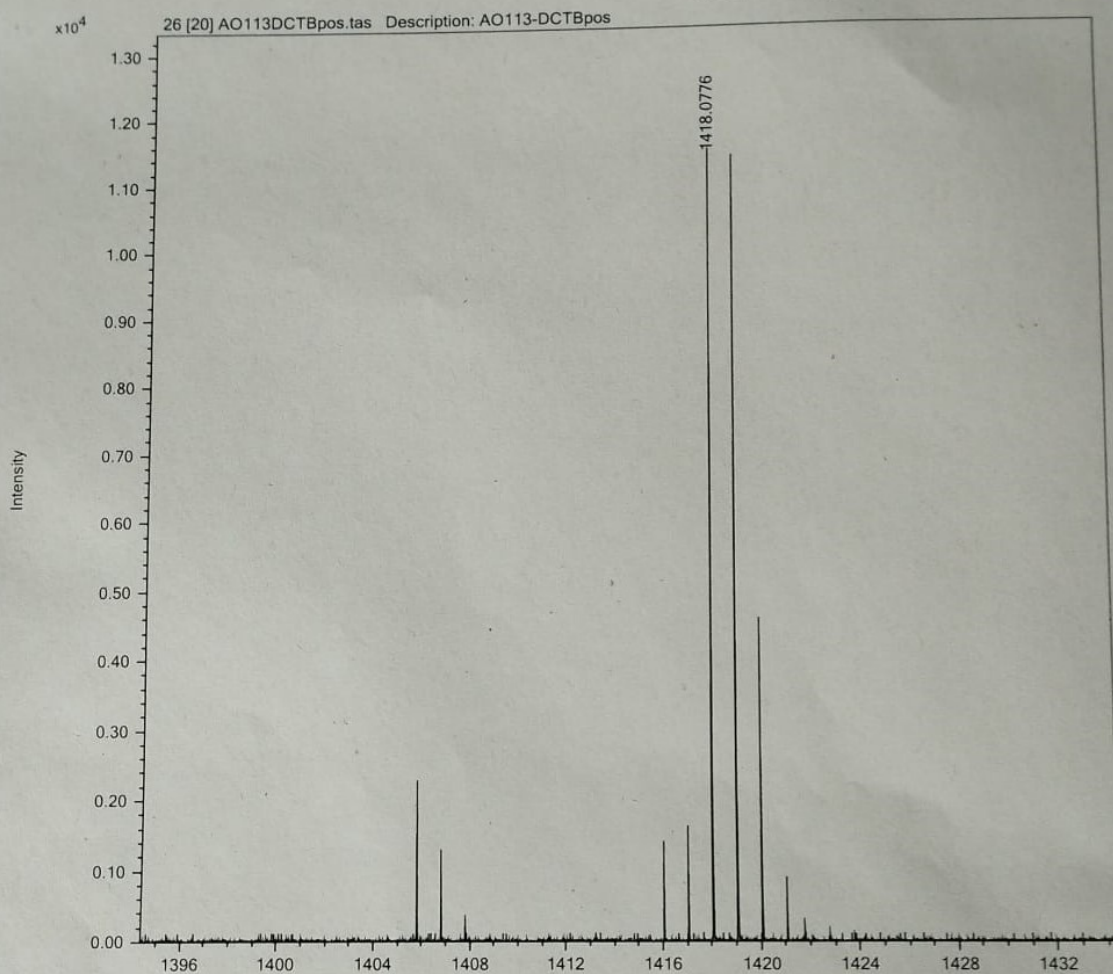

## Elemental Composition Estimation

## Parameters:

|                          |           |               |        |              |             |
|--------------------------|-----------|---------------|--------|--------------|-------------|
| Mass                     | Tolerance | Electron Mode | Charge | DBE Range    | Max Results |
| 1418.07757 $\pm$ 0.00425 | 3.0 ppm   | Even          | +1     | -0.5 - 100.0 | 100         |

## Elements

|   |         |   |         |   |        |   |       |    |       |    |       |
|---|---------|---|---------|---|--------|---|-------|----|-------|----|-------|
| C | 0 - 150 | H | 0 - 200 | N | 0 - 15 | O | 0 - 0 | Na | 0 - 0 | Si | 0 - 0 |
|---|---------|---|---------|---|--------|---|-------|----|-------|----|-------|

## Results:

| # | Formula                                          | Mass       | DBE  | Abs. Error (u) | Error (u) | Error (ppm) |
|---|--------------------------------------------------|------------|------|----------------|-----------|-------------|
| 1 | C <sub>93</sub> H <sub>133</sub> N <sub>12</sub> | 1418.07707 | 33.5 | 0.00050        | 0.00050   | 0.35        |

Figure S16 HMRS spectrum of compound 4c

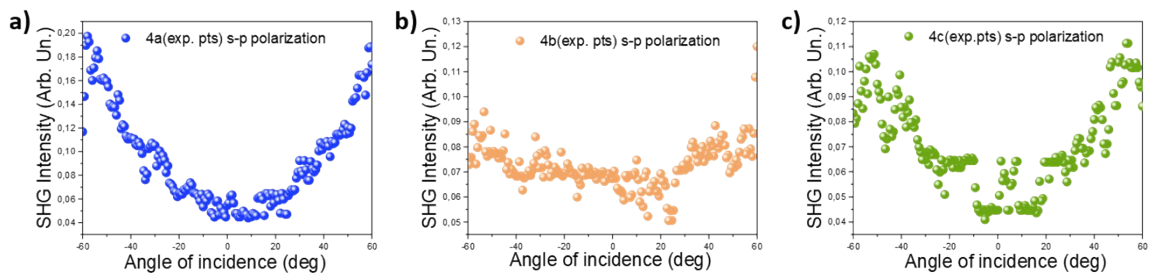

**Figure S17** Maker fringes signals for all the materials measured in the s-p configuration: a) 4a, b) 4b and c) 4c
